# Supplementary material for: Direct identification of clinically relevant neoepitopes presented on native human melanoma tissue by mass spectrometry
Source: PubMed Central journal article supplement (PMC5121339; doi:10.1038/ncomms13404), 2016-11-21
Supplement: ncomms13404-s1.pdf [file ncomms13404-s1.pdf]

a

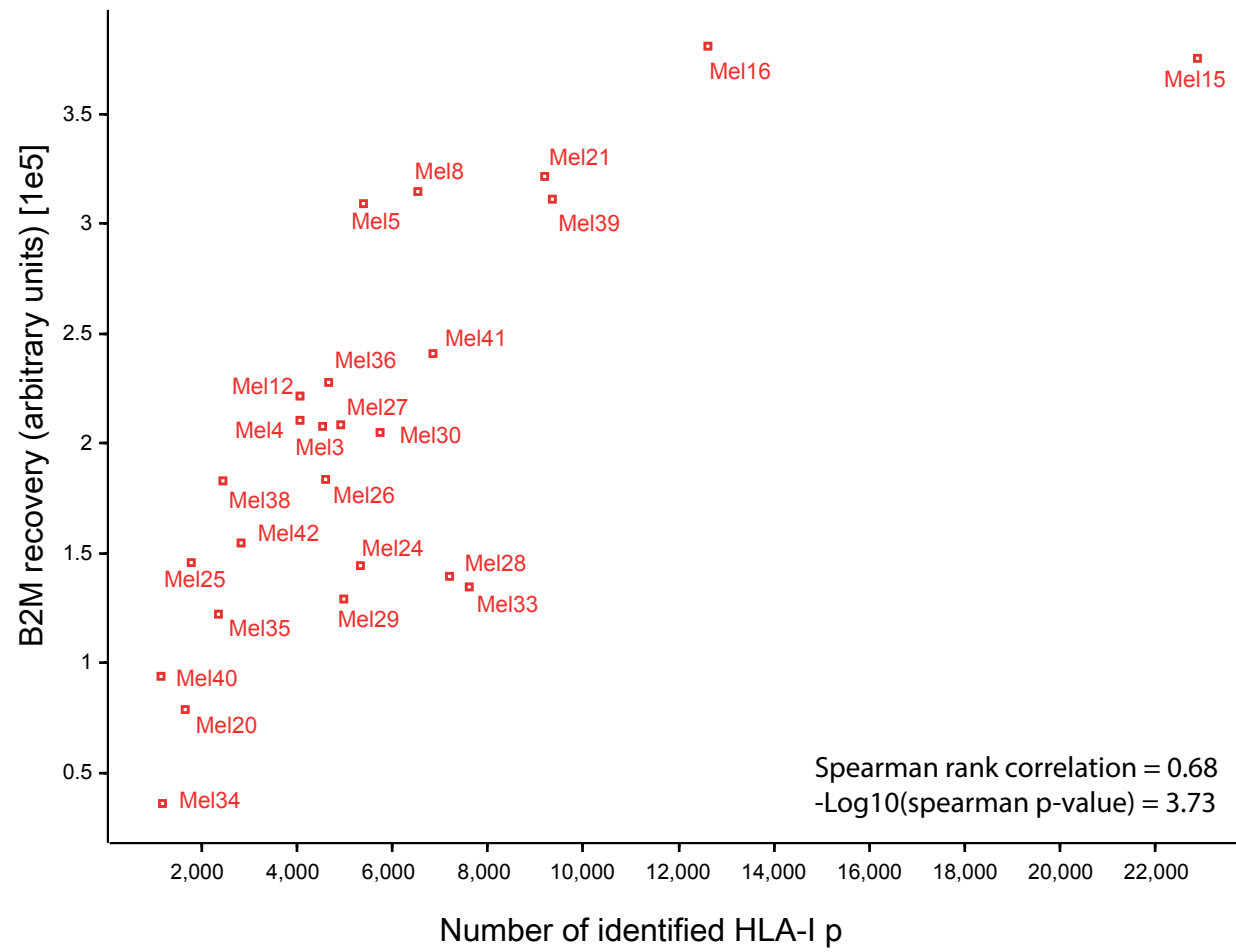

b

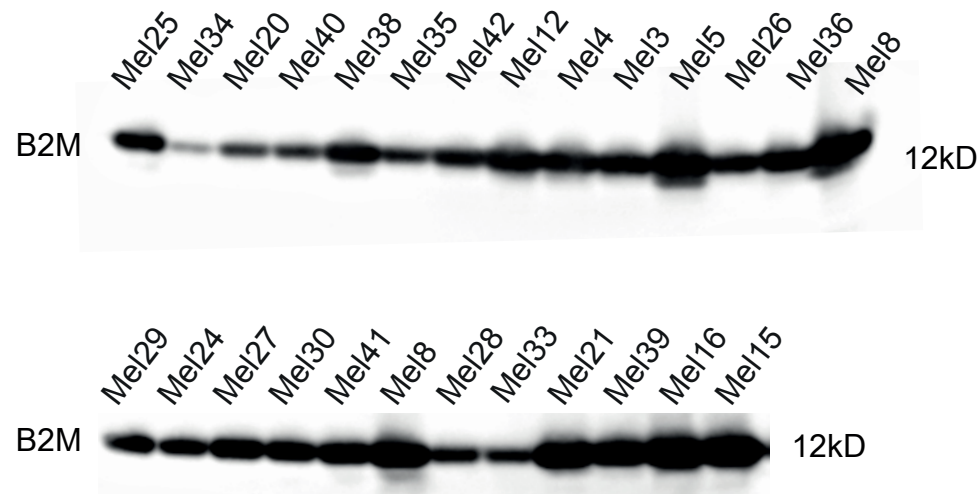

**Supplementary Figure 1:** Estimation of recovery of HLA complexes after affinity purification. Significant positive correlation between the number of identified peptides in the HLA class I peptidome and amount of the recovered beta-2 microglobulin (B2M) in each tissue sample (a). Western Blot results used for quantification of recovered B2M (b).

a

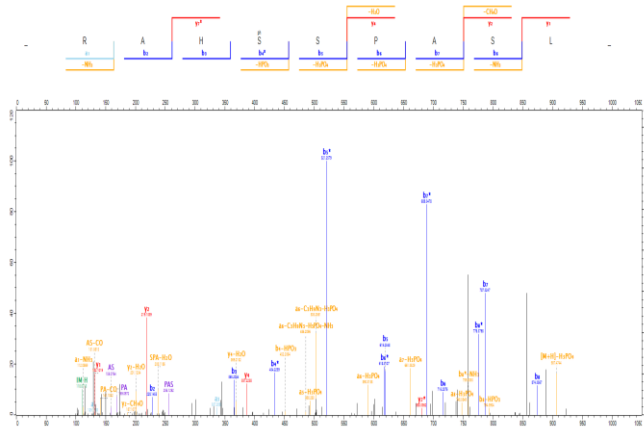

b

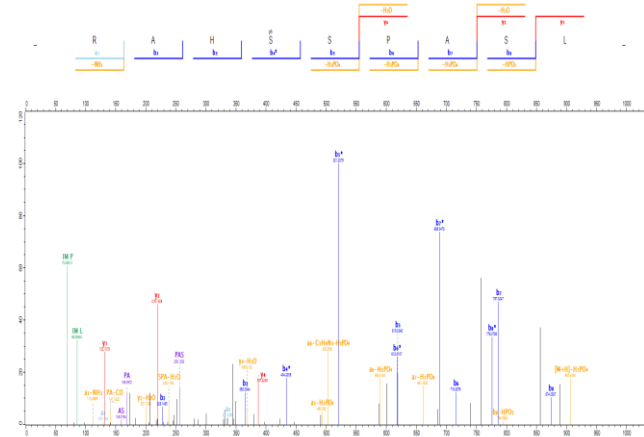

YAP1\_RAHS(ph)SPASL\_

**Supplementary Figure 2.** MSMS spectra of YAP1\_RAHS(ph)SPASL\_ peptide. Eluted HLA binding peptide **(a)** and the corresponding synthetic peptide **(b)**.

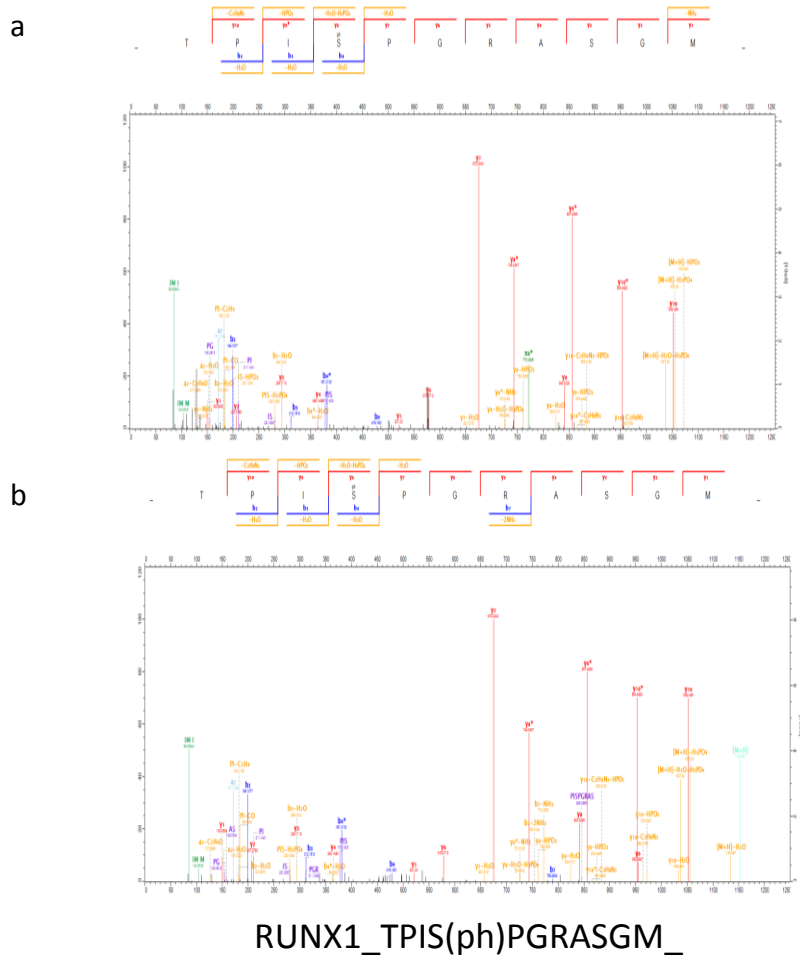

**Supplementary Figure 3.** MS/MS spectra of RUNX1\_TPIS(ph)PGRASGM\_ peptide. Eluted HLA binding peptide **(a)** and the corresponding synthetic peptide **(b)**.

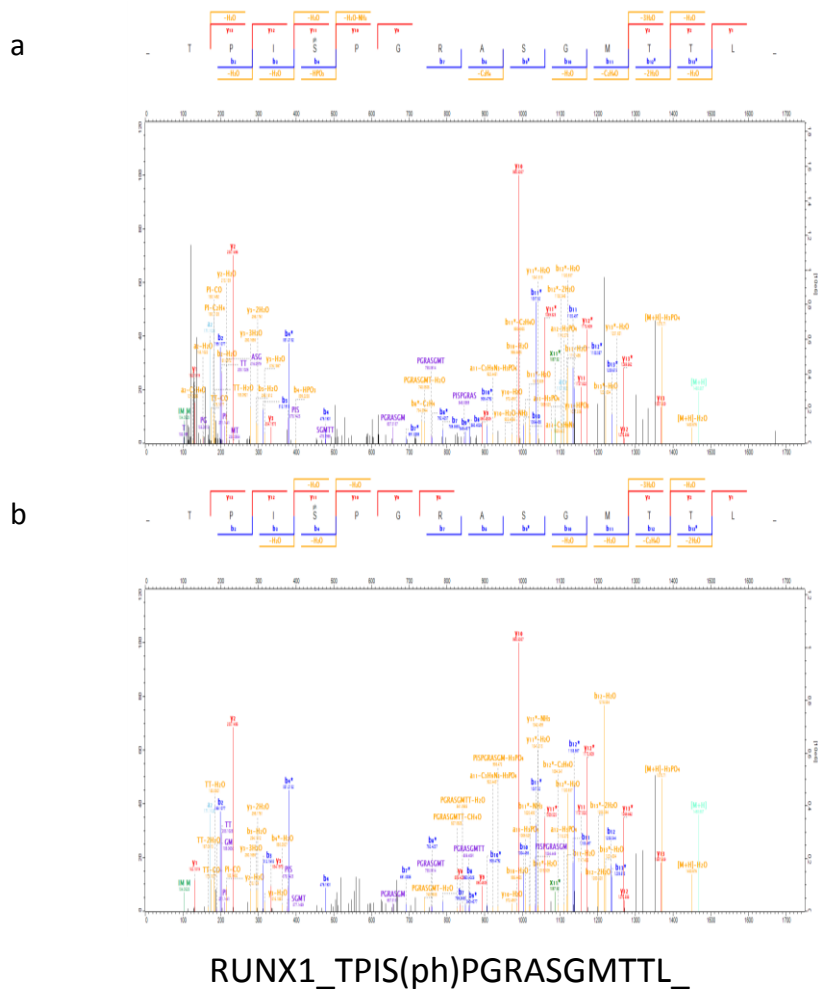

**Supplementary Figure 4.** MSMS spectra of RUNX1\_TPIS(ph)PGRASGMTTL\_ peptide. Eluted HLA binding peptide **(a)** and the corresponding synthetic peptide **(b)**.

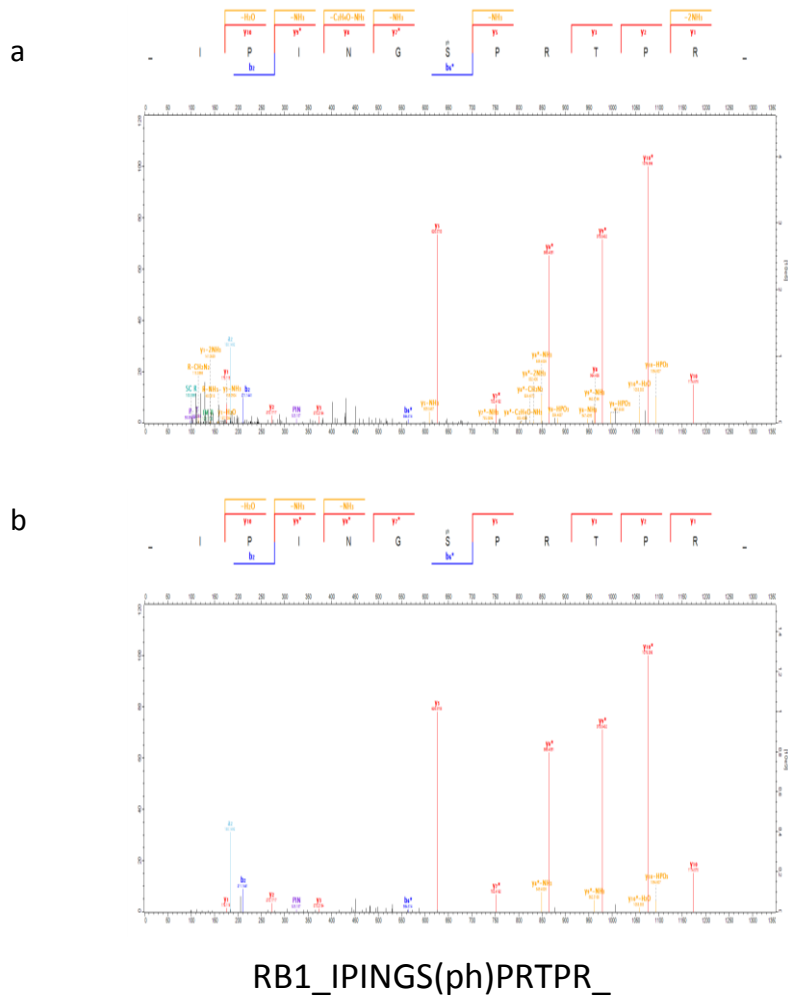

**Supplementary Figure 5.** MSMS spectra of RB1\_IPINGS(ph)PRTPR\_ peptide. Eluted HLA binding peptide **(a)** and the corresponding synthetic peptide **(b)**.

a

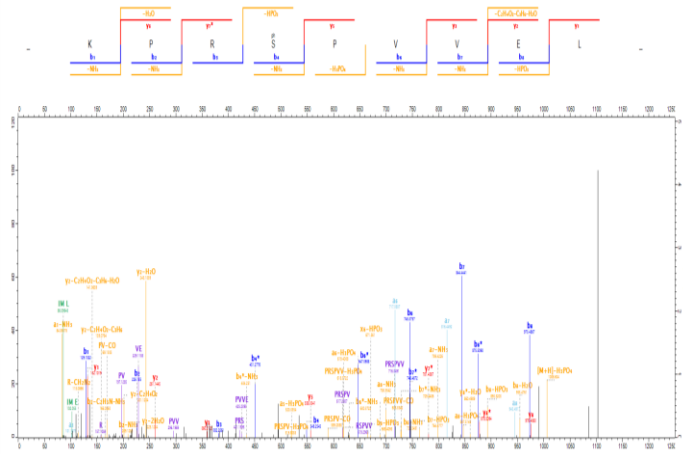

b

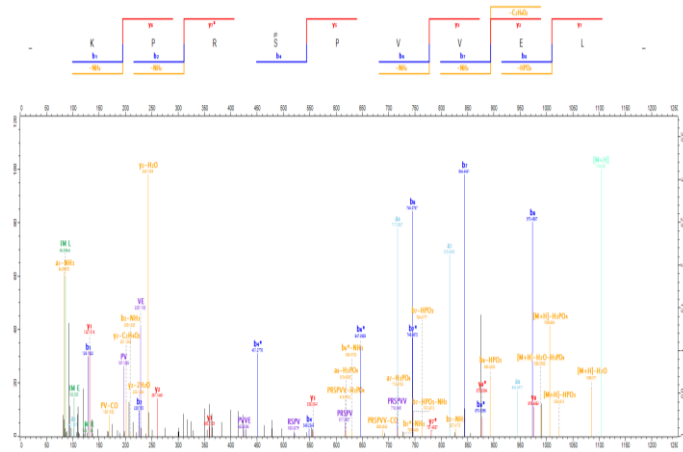

ADRBK1\_KPRS(ph)PVVEL\_

**Supplementary Figure 6.** MSMS spectra of ADRBK1\_KPRS(ph)PVVEL\_ peptide. Eluted HLA binding peptide **(a)** and the corresponding synthetic peptide **(b)**.

a

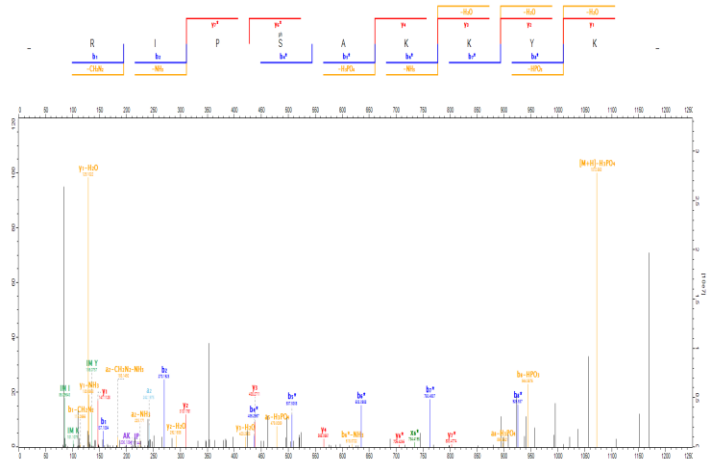

b

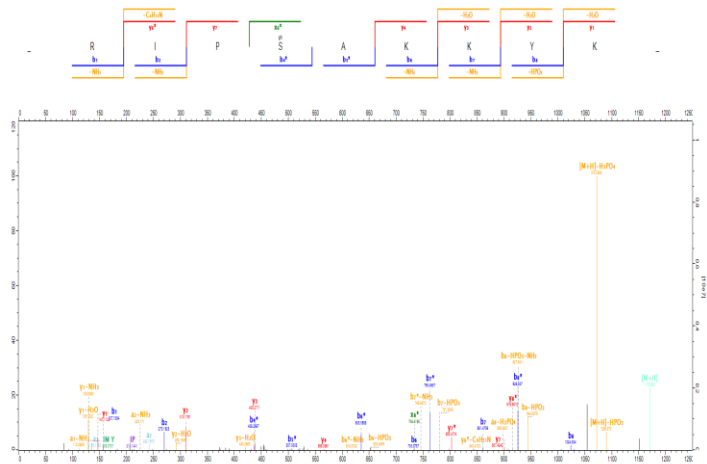

PEA15\_RIPS(ph)AKKYK\_

**Supplementary Figure 7.** MSMS spectra of PEA15\_RIPS(ph)AKKYK\_ peptide. Eluted HLA binding peptide **(a)** and the corresponding synthetic peptide **(b)**.

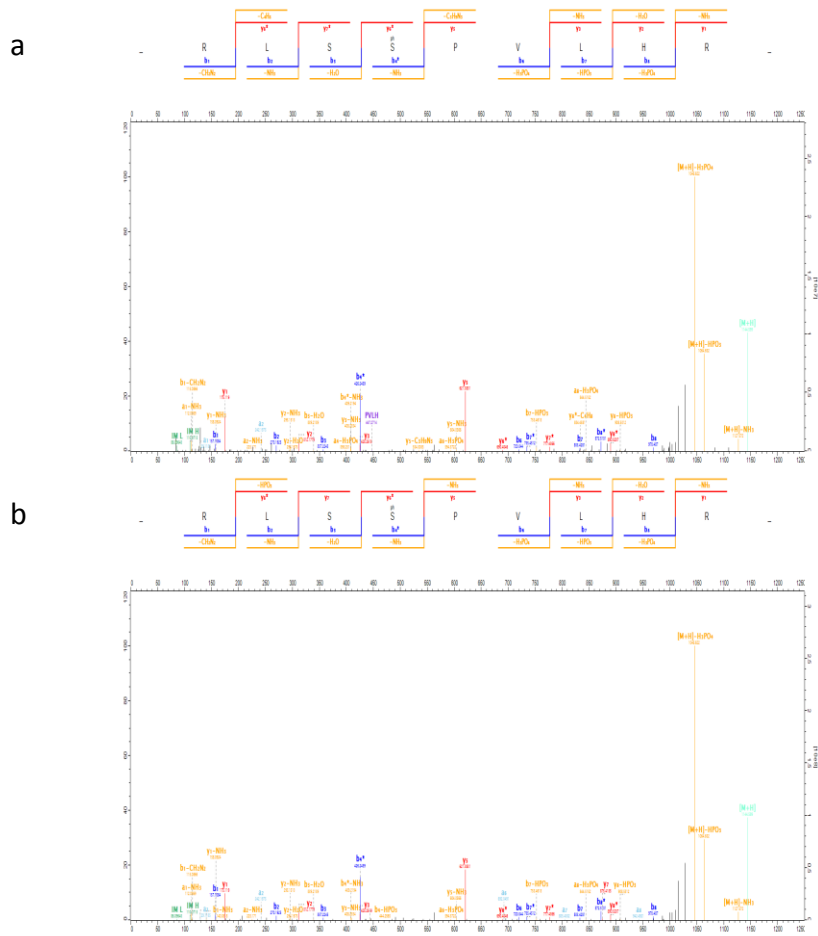

DBN1\_RLSS(ph)PVLHR\_

**Supplementary Figure 8.** MSMS spectra of DBN1\_RLSS(ph)PVLHR\_ peptide. Eluted HLA binding peptide **(a)** and the corresponding synthetic peptide **(b)**.



a

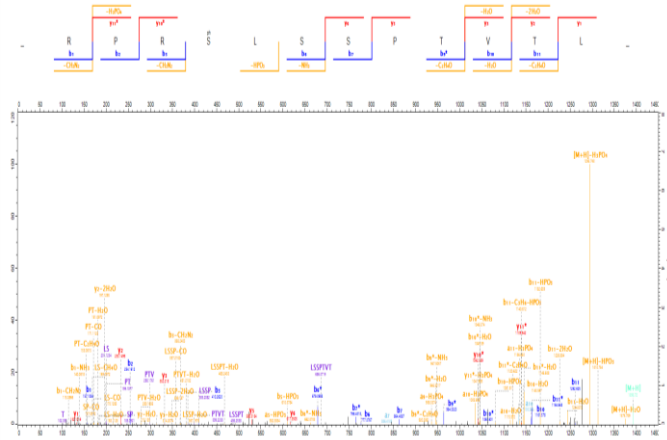

b

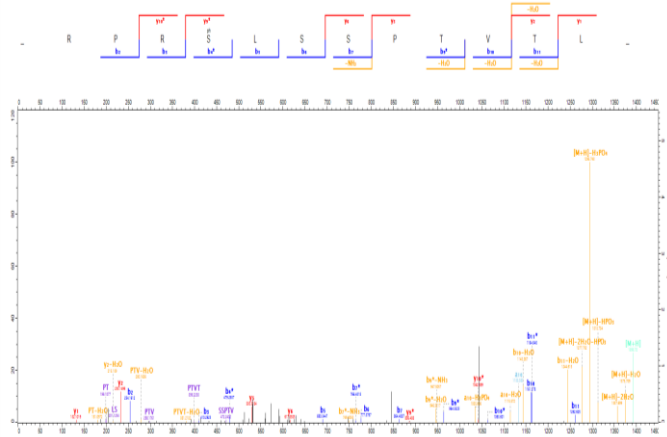

NEDD4L\_RPRS(ph)LSSPTVTL\_

**Supplementary Figure 9.** MSMS spectra of NEDD4L\_RPRS(ph)LSSPTVTL\_ peptide. Eluted HLA binding peptide **(a)** and the corresponding synthetic peptide **(b)**.

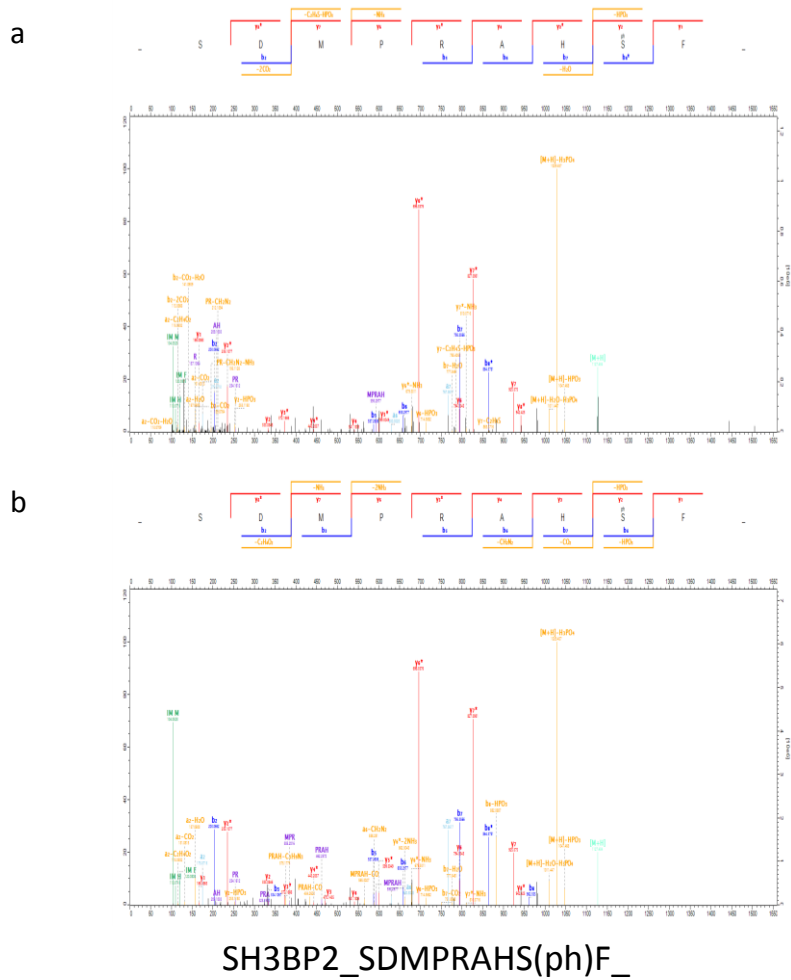

SH3BP2\_SDMMPRAHS(ph)F\_

**Supplementary Figure 10.** MSMS spectra of SH3BP2\_SDMMPRAHS(ph)F\_ peptide. Eluted HLA binding peptide **(a)** and the corresponding synthetic peptide **(b)**.

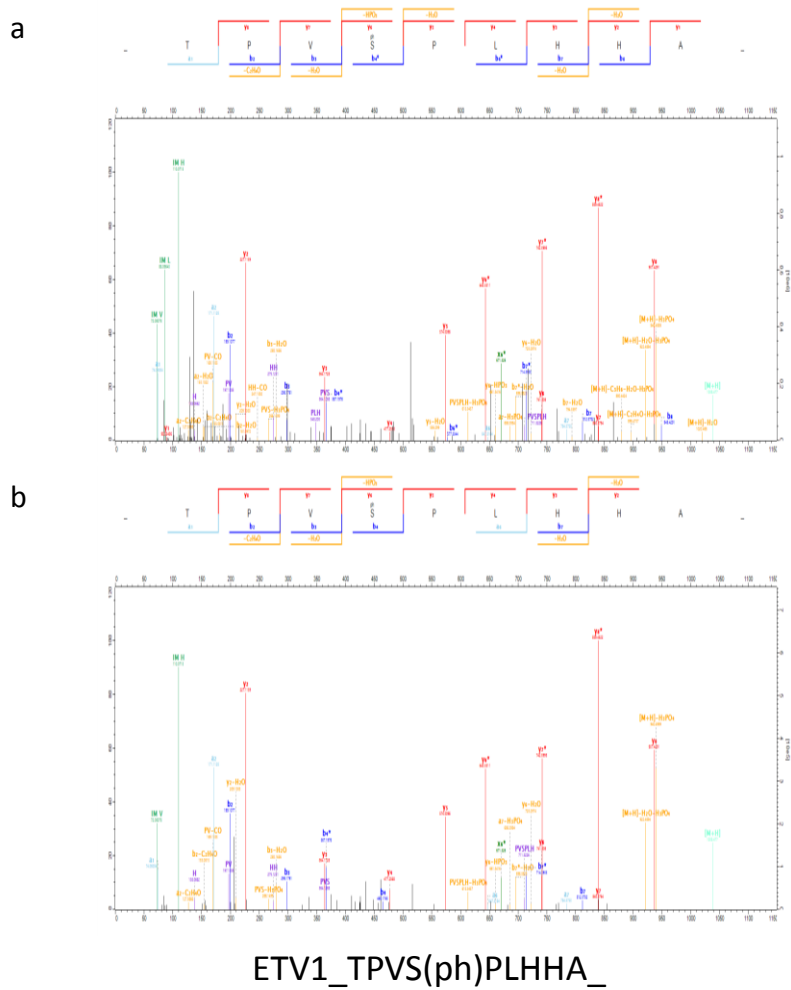

**Supplementary Figure 11.** MS/MS spectra of ETV1\_TPVS(ph)PLHHA\_ peptide. Eluted HLA binding peptide **(a)** and the corresponding synthetic peptide **(b)**.

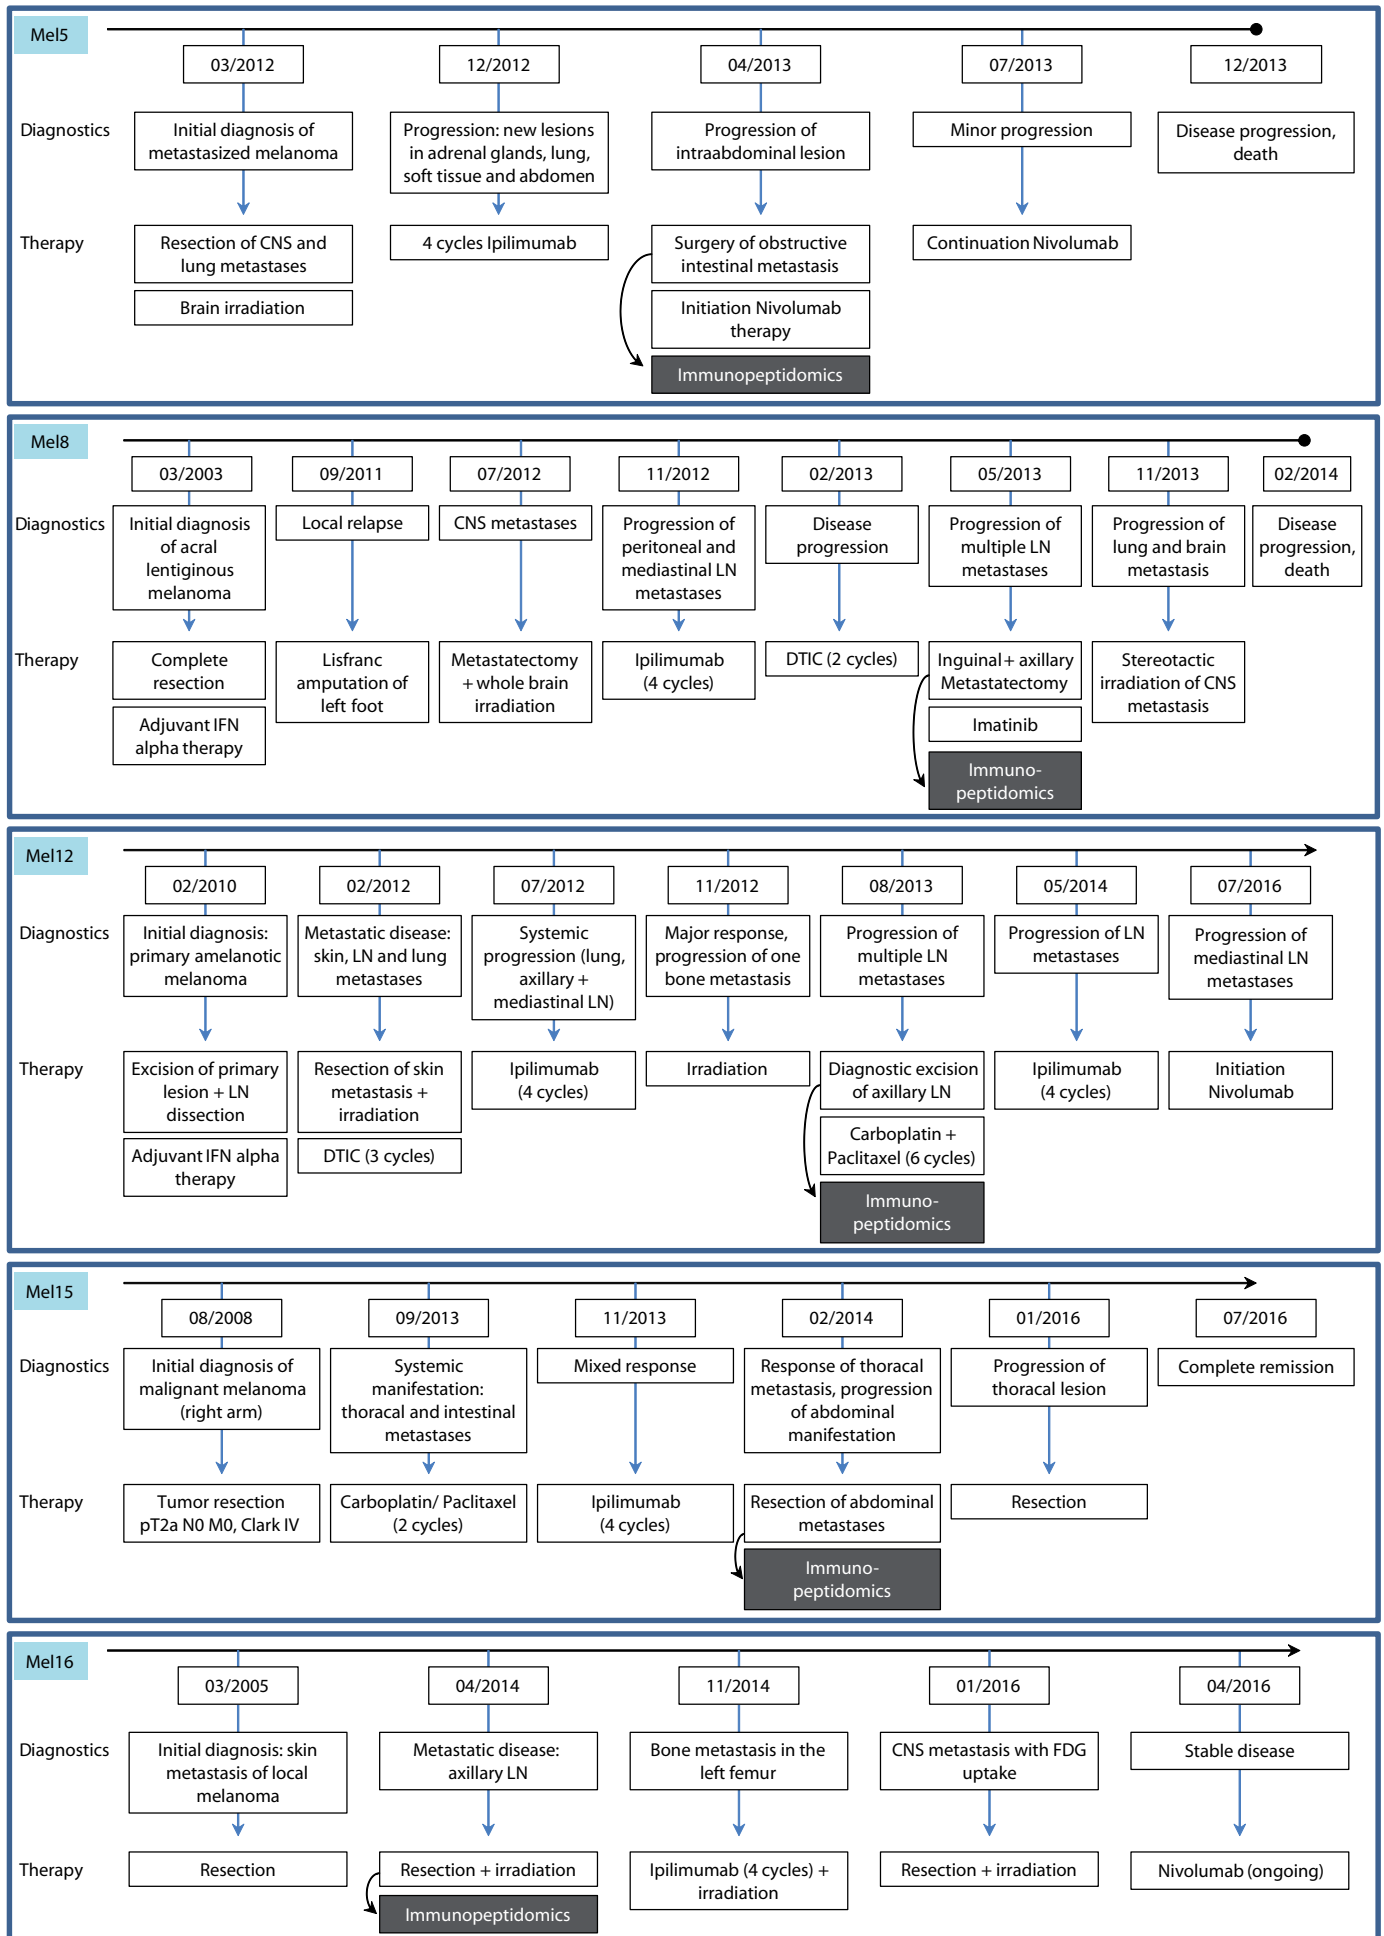

**Supplemental Figure 12. Clinical courses of patients Mel5, Mel8, Mel12, Mel15 and Mel16.** CNS = central nervous system; LN = lymph node; DTIC = Dacarbazine.

a

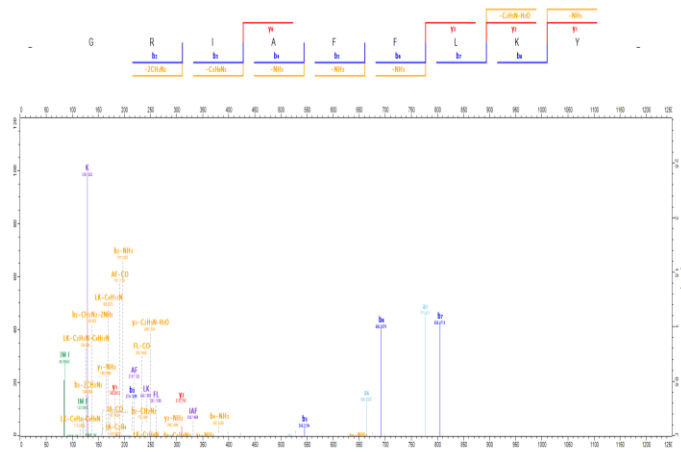

b

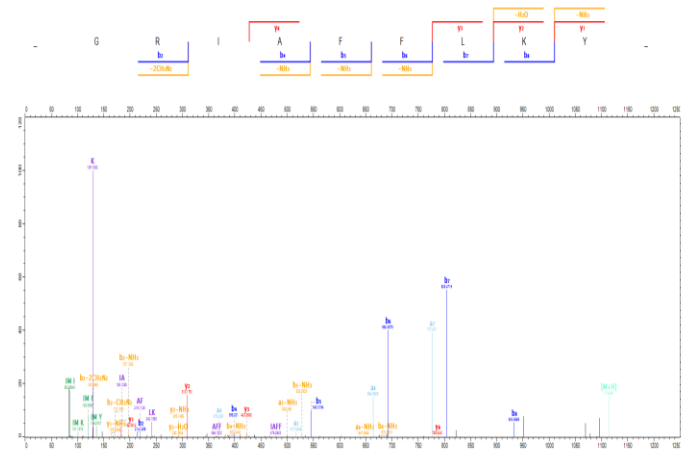

### SYTL4\_358mut

**Supplementary Figure 13.** MSMS spectra of SYTL4\_358mut peptide. Eluted HLA binding peptide (a) and the corresponding synthetic peptide (b).

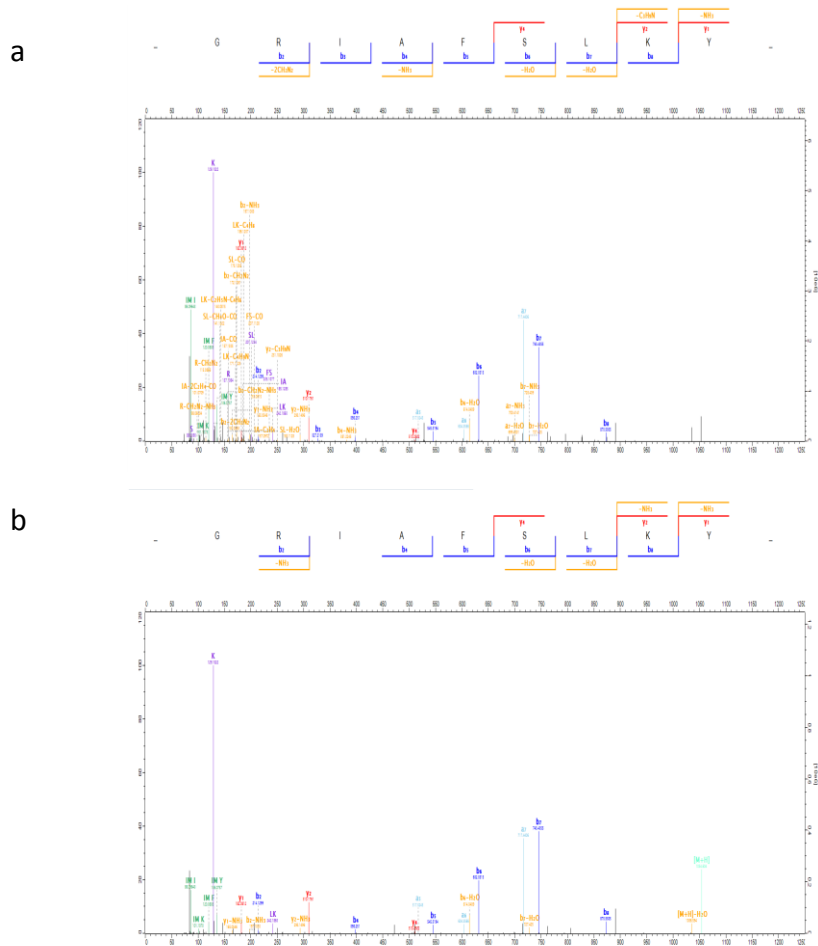

### SYTL4\_358wt

**Supplementary Figure 14.** MS/MS spectra of SYTL4\_358wt peptide. Eluted HLA binding peptide **(a)** and the corresponding synthetic peptide **(b)**.

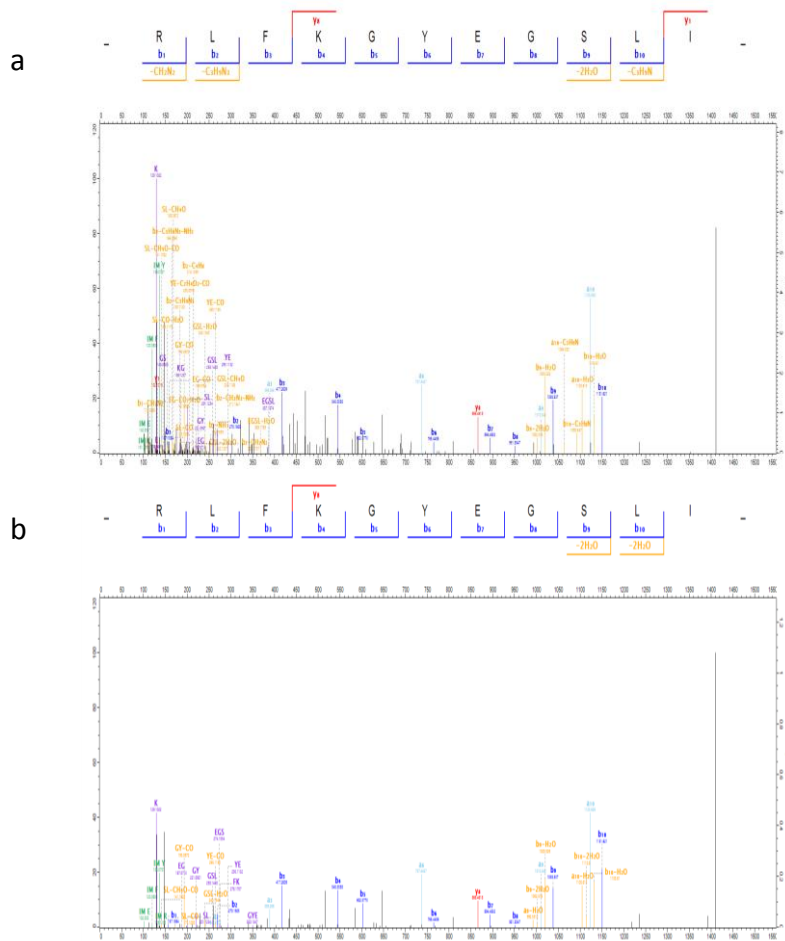

### RBPM5\_45mut

**Supplementary Figure 15.** MSMS spectra of RBPM5\_45mut peptide. Eluted HLA binding peptide **(a)** and the corresponding synthetic peptide **(b)**.

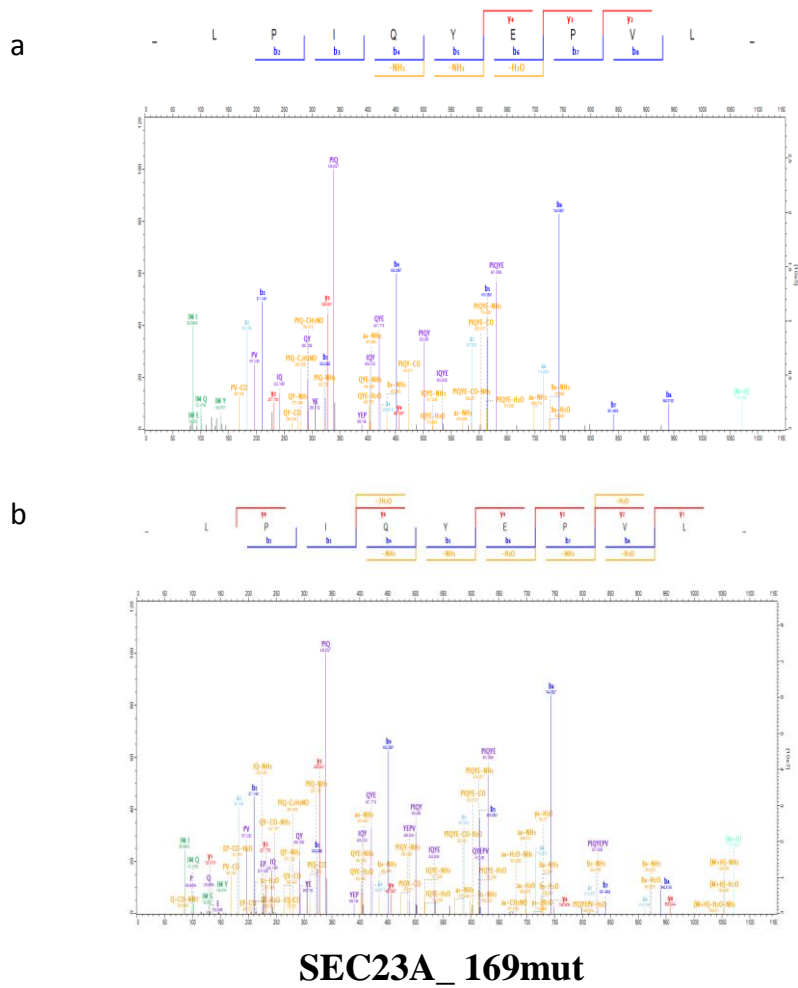

### SEC23A\_169mut

**Supplementary Figure 16.** MSMS spectra of SEC23A\_169mut peptide. Eluted HLA binding peptide **(a)** and the corresponding synthetic peptide **(b)**.



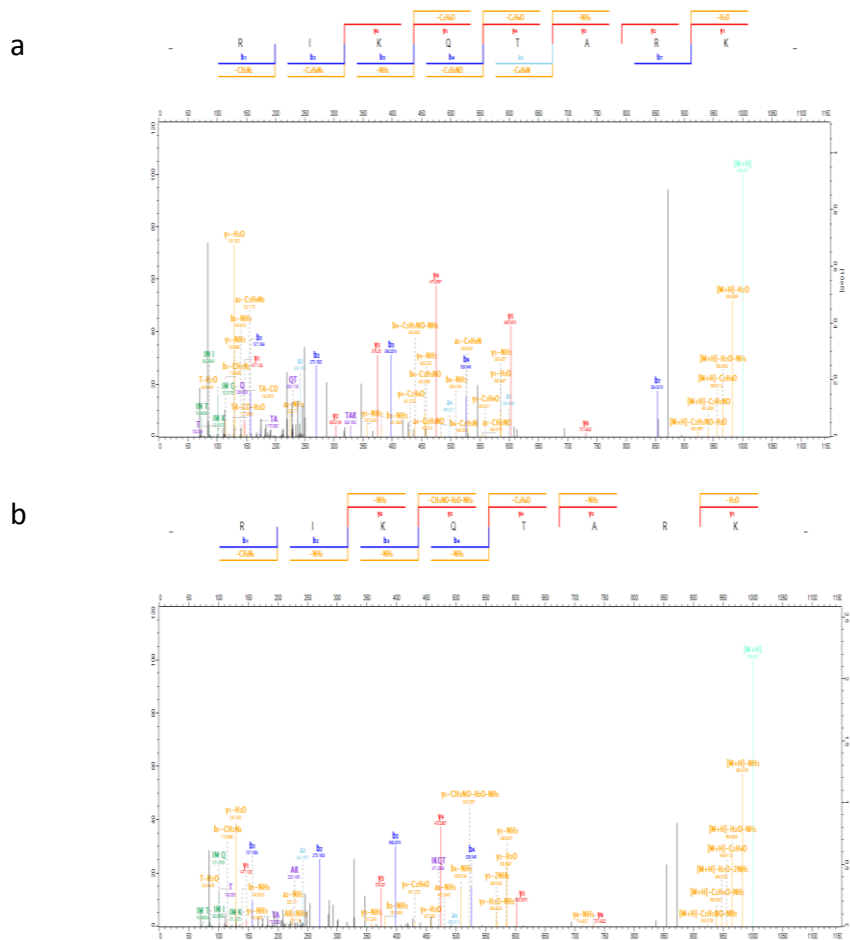

### H3F3C\_3mut

**Supplementary Figure 17.** MSMS spectra of H3F3C\_3mut peptide. Eluted HLA binding peptide **(a)** and the corresponding synthetic peptide **(b)**.

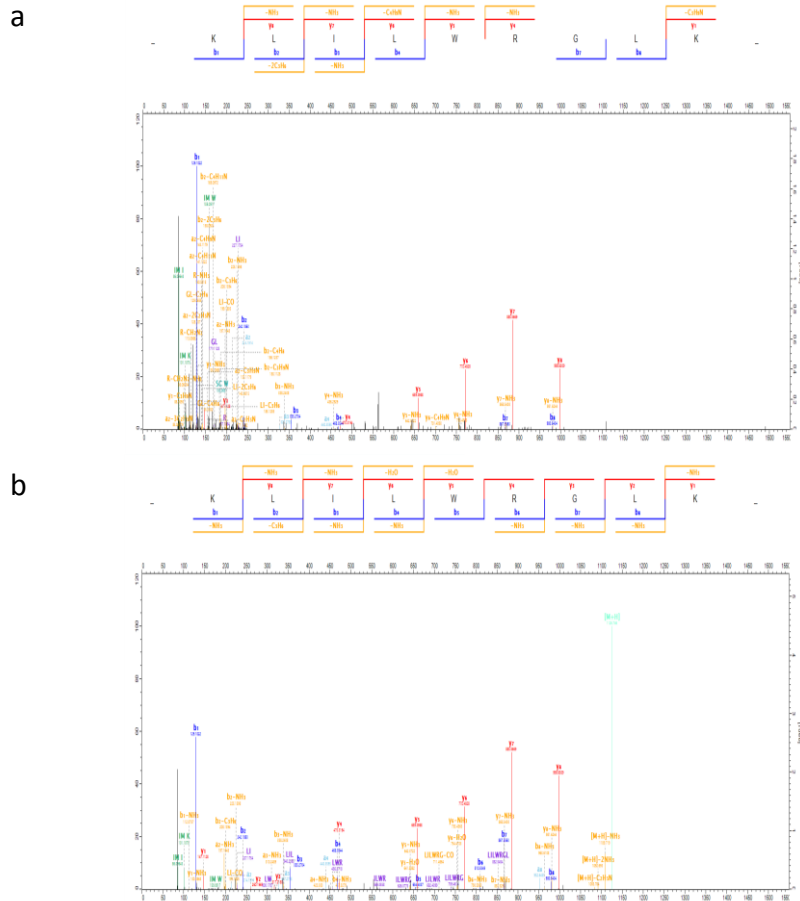

### NCAPG2\_332mut

**Supplementary Figure 18.** MSMS spectra of NCAPG2\_332mut peptide. Eluted HLA binding peptide **(a)** and the corresponding synthetic peptide **(b)**.

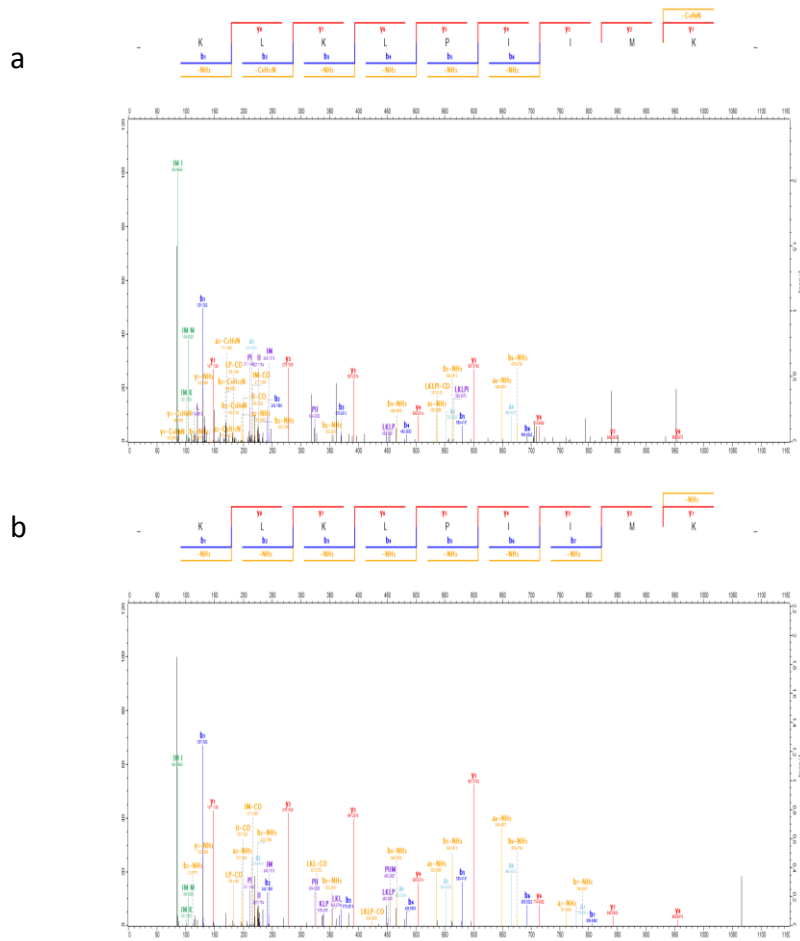

## AKAP6\_1477mut

**Supplementary Figure 19.** MSMS spectra of AKAP6\_1477mut peptide. Eluted HLA binding peptide **(a)** and the corresponding synthetic peptide **(b)**.

a

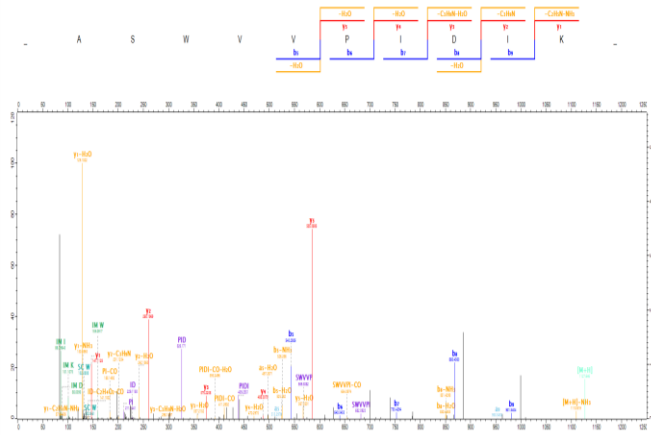

b

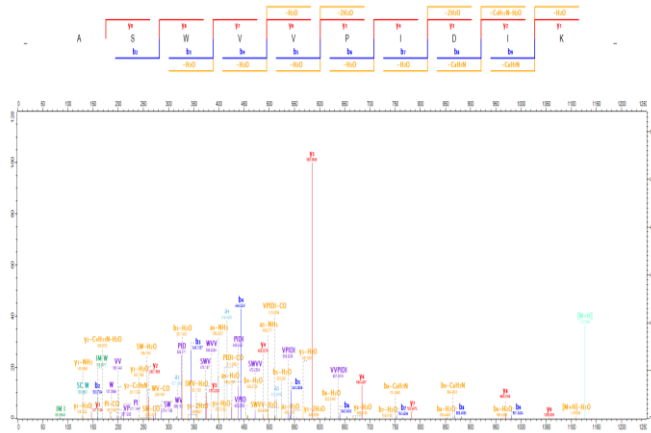

## MAPK3K9\_679mut

**Supplementary Figure 20.** MSMS spectra of MAPK3K9\_679mut peptide. Eluted HLA binding peptide (a) and the corresponding synthetic peptide (b).

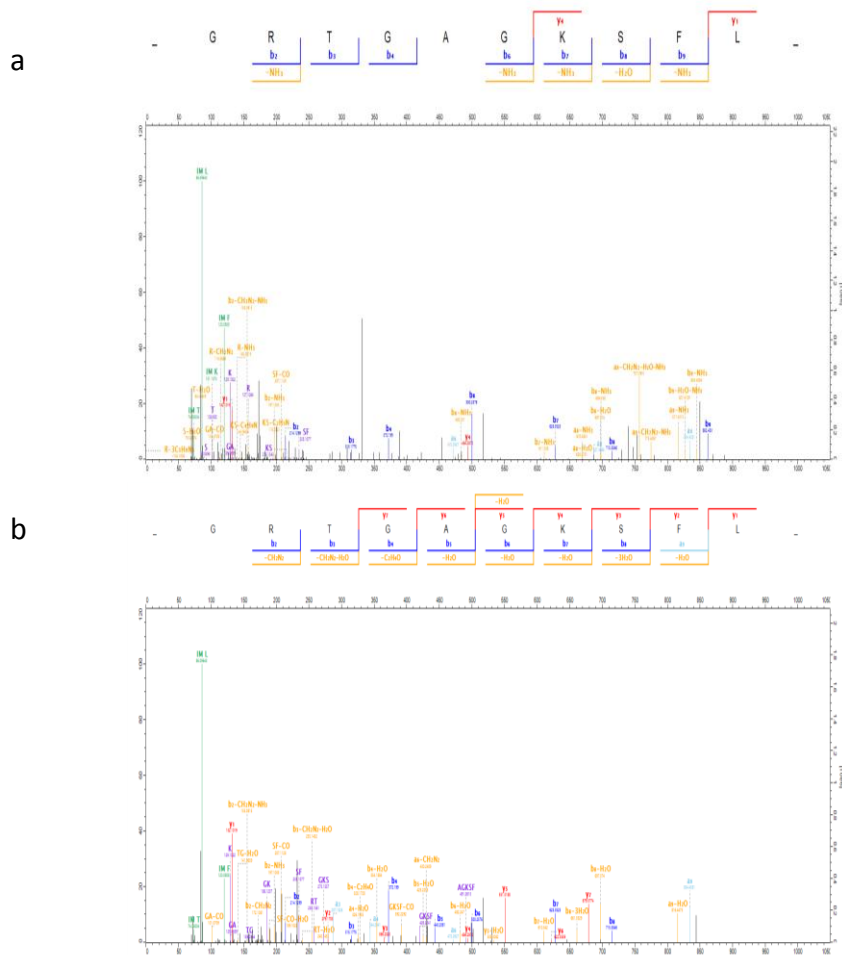

## ABCC2\_1334mut

**Supplementary Figure 21.** MSMS spectra of ABCC2\_1334mut peptide. Eluted HLA binding peptide **(a)** and the corresponding synthetic peptide **(b)**.

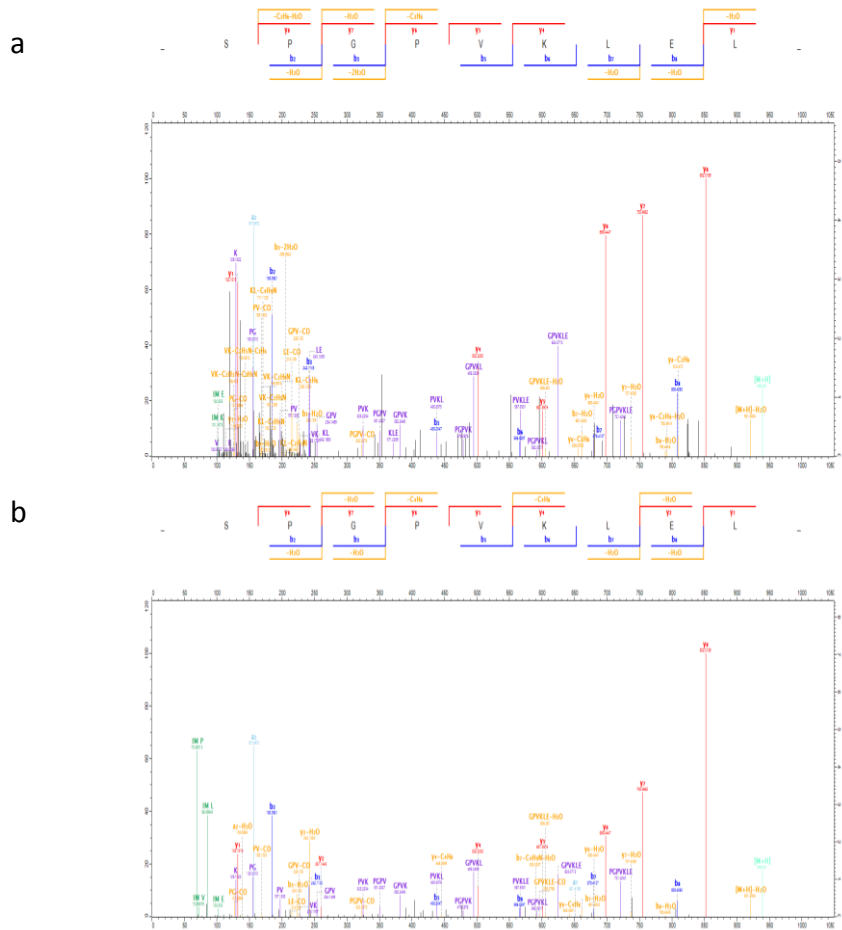

## NOP16\_169mut

**Supplementary Figure 22.** MSMS spectra of NOP16\_169mut peptide. Eluted HLA binding peptide **(a)** and the corresponding synthetic peptide **(b)**.

a

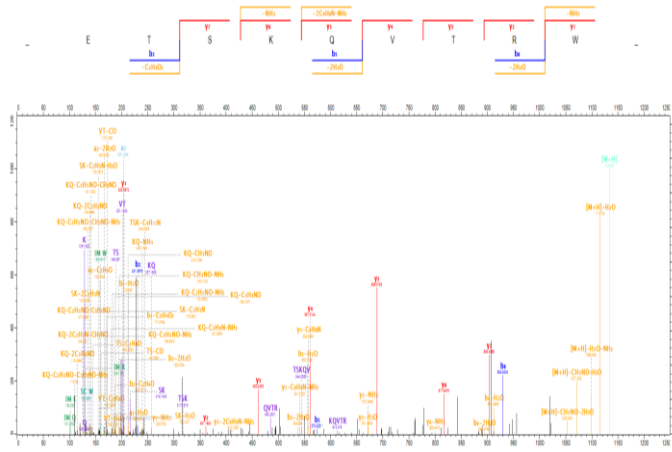

b

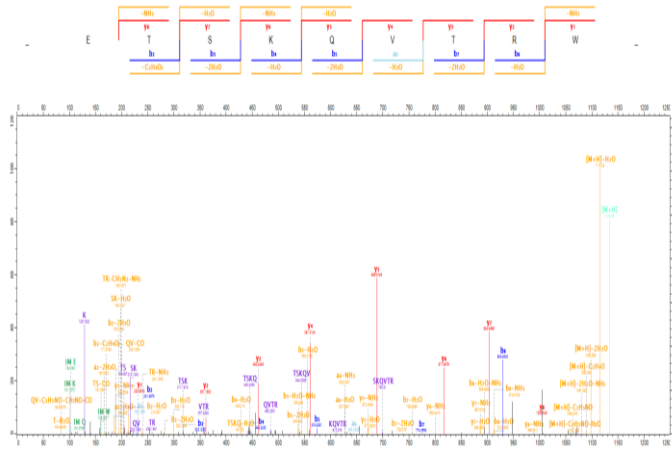

### GABPA\_158mut

**Supplementary Figure 23.** MSMS spectra of GABPA\_158mut peptide. Eluted HLA binding peptide (a) and the corresponding synthetic peptide (b).

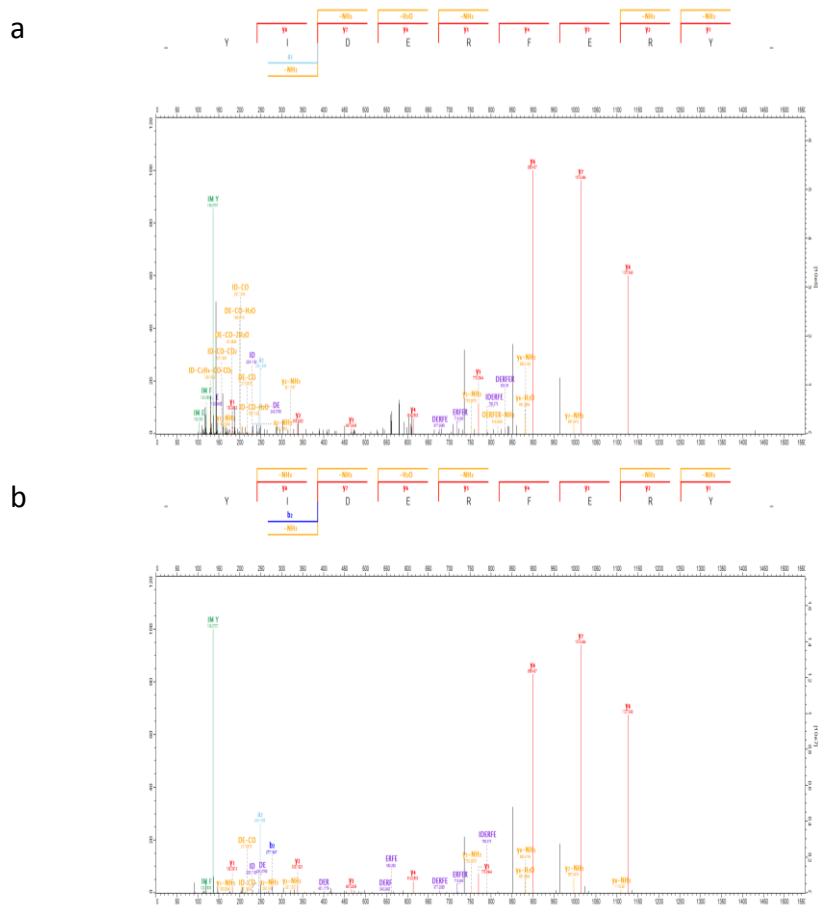

### SEPT2\_121mut

**Supplementary Figure 24.** MSMS spectra of SEPT2\_121mut peptide. Eluted HLA binding peptide **(a)** and the corresponding synthetic peptide **(b)**.



## Supplementary Table 1: General patient information

| Patient | Gender | Age at biopsy | Location of biopsy |
|---------|--------|---------------|--------------------|
| Mel3    | female | 56            | Soft tissue        |
| Mel4    | male   | 80            | Bone, soft tissue  |
| Mel5    | male   | 50            | Lymph node         |
| Mel8    | female | 66            | Lymph node         |
| Mel12   | male   | 65            | Lymph node         |
| Mel15   | male   | 63            | Small intestine    |
| Mel16   | female | 61            | Lymph node         |
| Mel20   | male   | 78            | Lymph node         |
| Mel21   | male   | 60            | Lymph node         |
| Mel24   | male   | 37            | Lymph node         |
| Mel25   | male   | 44            | Lymph node         |
| Mel26   | female | 69            | Lymph node         |
| Mel27   | female | 71            | Lymph node         |
| Mel28   | female | 66            | Lymph node         |
| Mel29   | female | 67            | Lymph node         |
| Mel30   | female | 68            | Lymph node         |
| Mel33   | male   | 54            | Lymph node         |
| Mel34   | male   | 37            | Lung               |
| Mel35   | male   | 43            | Lymph node         |
| Mel36   | male   | 40            | Lymph node         |
| Mel38   | male   | 59            | Adrenal gland      |
| Mel39   | male   | 72            | Lymph node         |
| Mel40   | male   | 91            | Soft tissue        |
| Mel41   | male   | 68            | Lymph node         |
| Mel42   | female | 69            | Soft tissue        |

## Supplementary Table 2: Information of patients selected for neopeptide identification

| Patient | Stage <sup>A</sup> | Stage at biopsy | LDH <sup>B</sup> | S100 <sup>C</sup> | Defined mutations      | HLA type <sup>D</sup>                                                  |
|---------|--------------------|-----------------|------------------|-------------------|------------------------|------------------------------------------------------------------------|
| Mel5    | IV                 | M1C             | 426              | 1253              | -                      | A*01, A*25, B*08, B*18                                                 |
| Mel8    | IV                 | M1C             | 340              | 668               | cKIT p.L576P (Exon 11) | A*01:01:01, A*03:01:01, B*07:02:01, B*08:01:01, C*07:01:01, C*07:02:01 |
| Mel12   | IV                 | M1C             | 266              | 56                | -                      | A*01:01:01, B*08:01:01, C*07:01:01                                     |
| Mel15   | IV                 | M1C             | 174              | 82                | -                      | A*03:01:01, A*68:01:01, B*27:05:02, B*35:03:01, C*02:02:02, C*04:01:01 |
| Mel16   | IV                 | M1C             | 215              | 94                | BRAF V600E             | A*01:01:01, A*24:02:01, B*07:02:01, B*08:01:01, C*07:01:01, C*07:02:01 |

<sup>A</sup>Tumor staging according to Union international contre le cancer (UICC)

<sup>B</sup>At time of metastasectomy (U/L), physiological range < 244 U/L

<sup>C</sup>At time of metastasectomy (pg/ml), physiological range < 100pg/ml

<sup>D</sup>Mel5: determined by HLA miner; all other patients: typed by next-generation sequencing

Supplementary Table 3: MS data of mutated peptide ligands and their synthetic counterparts

| Gene Name | Sequence (Position)   | ENSEMBL Transcript ID | a.a alteration | Confidence   | HLA peptide                                                          |                                                                                                                           |                      | Synthetic peptide                                                    |                                                                                                                           |                      |
|-----------|-----------------------|-----------------------|----------------|--------------|----------------------------------------------------------------------|---------------------------------------------------------------------------------------------------------------------------|----------------------|----------------------------------------------------------------------|---------------------------------------------------------------------------------------------------------------------------|----------------------|
|           |                       |                       |                |              | Score-Peptide spectrum match (PSM) andromeda score (arbitrary units) | Delta score - Score difference between the highest scoring PSM and the next best scoring PSM with a different aa sequence | Retention time (min) | Score-Peptide spectrum match (PSM) andromeda score (arbitrary units) | Delta score - Score difference between the highest scoring PSM and the next best scoring PSM with a different aa sequence | Retention time (min) |
| SYTL4     | GRIAFFLKY (358-366)   | ENSP00000263033       | S363F          | High         | 113                                                                  | 77                                                                                                                        | 83                   | 116                                                                  | 76                                                                                                                        | 87                   |
| SYTL4     | GRIAFSLKY (358-366)   | ENSP00000263033       | None           | Not assigned | 84                                                                   | 44                                                                                                                        | 68                   | 84                                                                   | 42                                                                                                                        | 64                   |
| RBPMS     | RLFKGYEGSLIK (45-56)  | ENSP00000428675       | P46L           | High         | 110                                                                  | 62                                                                                                                        | 55                   | 146                                                                  | 88                                                                                                                        | 59                   |
| SEC23A    | LPIQYEPVL (52-60)     | ENSP00000306881       | P52L           | High         | 107                                                                  | 58                                                                                                                        | 97                   | 166                                                                  | 70                                                                                                                        | 106                  |
| H3F3C     | RIKQTARK (3-10)       | ENSP00000339835       | T4I            | High         | 101                                                                  | 37                                                                                                                        | 6                    | 118                                                                  | 53                                                                                                                        | 14                   |
| NCAPG2    | KLILWRGLK (332-340)   | ENSP00000387007       | P333L          | High         | 93                                                                   | 19                                                                                                                        | 66                   | 195                                                                  | 195                                                                                                                       | 68                   |
| AKAP6     | KLKLPIMK (1477-1485)  | ENSP00000280979       | M1482I         | High         | 87                                                                   | 70                                                                                                                        | 66                   | 138                                                                  | 85                                                                                                                        | 68                   |
| MAPK3K9   | ASWVVPIDIK (680-689)  | ENSP00000451263       | E689K          | Low          | 76                                                                   | 3                                                                                                                         | 82                   | 182                                                                  | 77                                                                                                                        | 99                   |
| ABCC2     | GRTGAGKSF (1334-1343) | ENSP00000359478       | S1342F         | Low          | 72                                                                   | 4                                                                                                                         | 37                   | 105                                                                  | 33                                                                                                                        | 34                   |
| NOP16     | SPGPVKLEL (161-169)   | ENSP00000479445       | P169L          | High         | 76                                                                   | 32                                                                                                                        | 65                   | 120                                                                  | 59                                                                                                                        | 71                   |
| GABPA     | ETSKQVTRW (158-166)   | ENSP00000346886       | E161K          | High         | 83                                                                   | 40                                                                                                                        | 29                   | 167                                                                  | 75                                                                                                                        | 31                   |
| SEPT2     | YIDERFERY (121-129)   | ENSP00000375834       | Q125R          | High         | 52                                                                   | 9                                                                                                                         | 49                   | 116                                                                  | 52                                                                                                                        | 54                   |
